# Supplementary material for: WIPI-1 Positive Autophagosome-Like Vesicles Entrap Pathogenic Staphylococcus aureus for Lysosomal Degradation
Source: PubMed Central journal article supplement (PMC3399381; doi:10.1155/2012/179207), 2012-07-09
Supplement: 179207.f6.pdf [file 179207.f6.pdf]

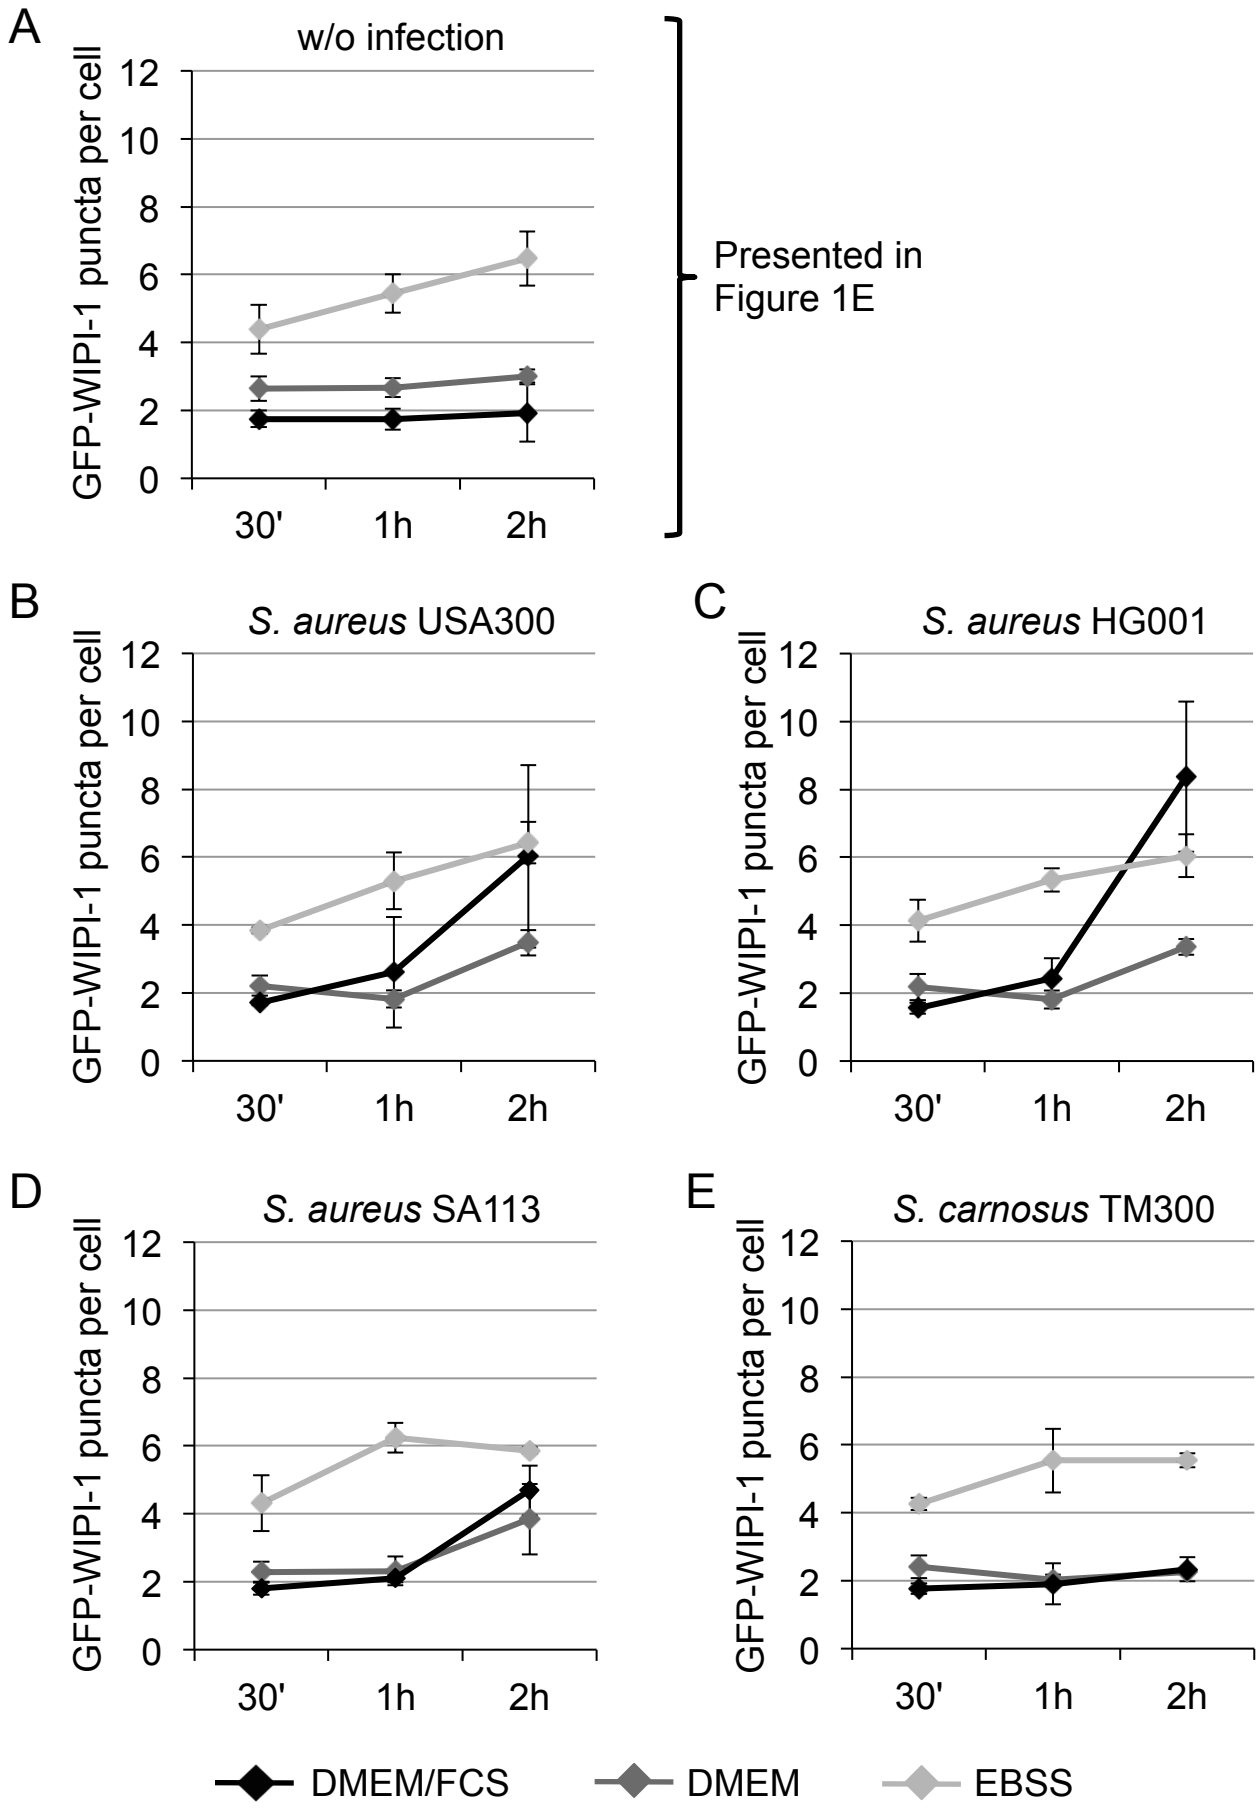

**Suppl. Figure 6**
