# Supplementary material for: WIPI-1 Positive Autophagosome-Like Vesicles Entrap PathogenicStaphylococcus aureusfor Lysosomal Degradation
Source: Hindawi journal article supplement (doi:10.1155/2012/179207), 2012-01-01
Supplement: f1 [file 179207.f1.pdf]

DMEM/FCS

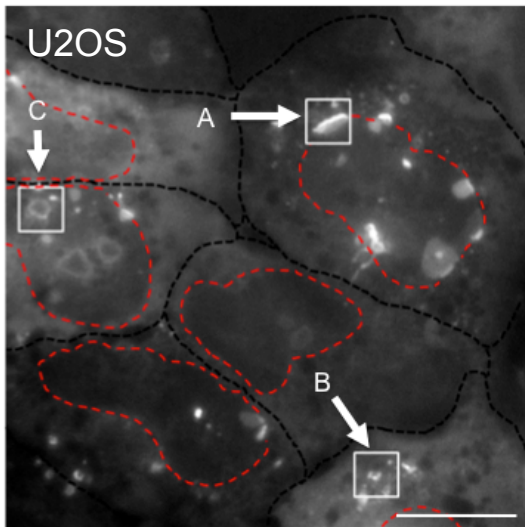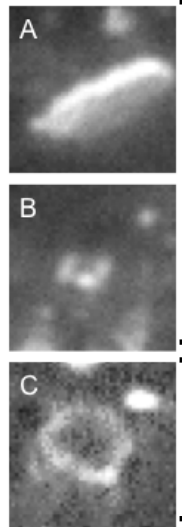

Canonical  
GFP-WIPI-1  
membranes

Infection induced  
GFP-WIPI-1  
membranes

Presented in  
Figure 2

DMEM

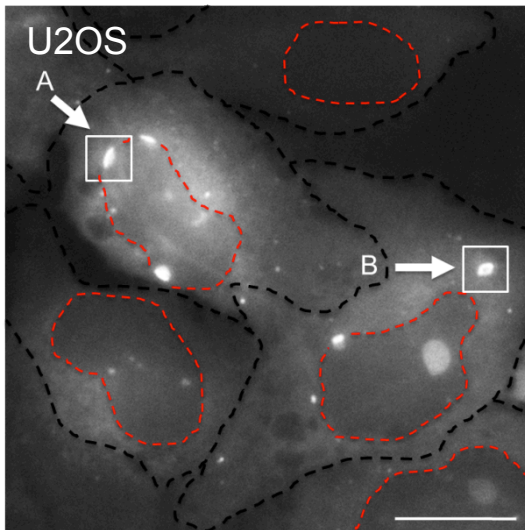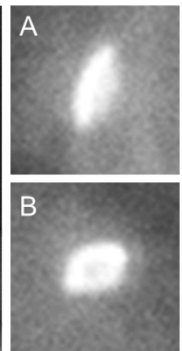

Canonical  
GFP-WIPI-1  
membranes

EBSS

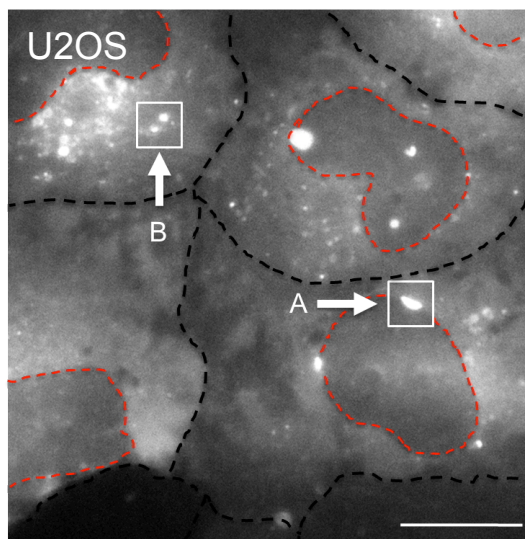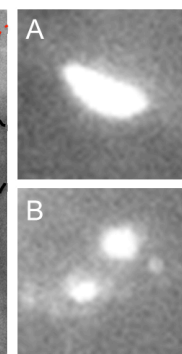

Canonical  
GFP-WIPI-1  
membranes
