# Supplementary material for: WIPI-1 Positive Autophagosome-Like Vesicles Entrap PathogenicStaphylococcus aureusfor Lysosomal Degradation
Source: Hindawi journal article supplement (doi:10.1155/2012/179207), 2012-01-01
Supplement: f2 [file 179207.f2.pdf]

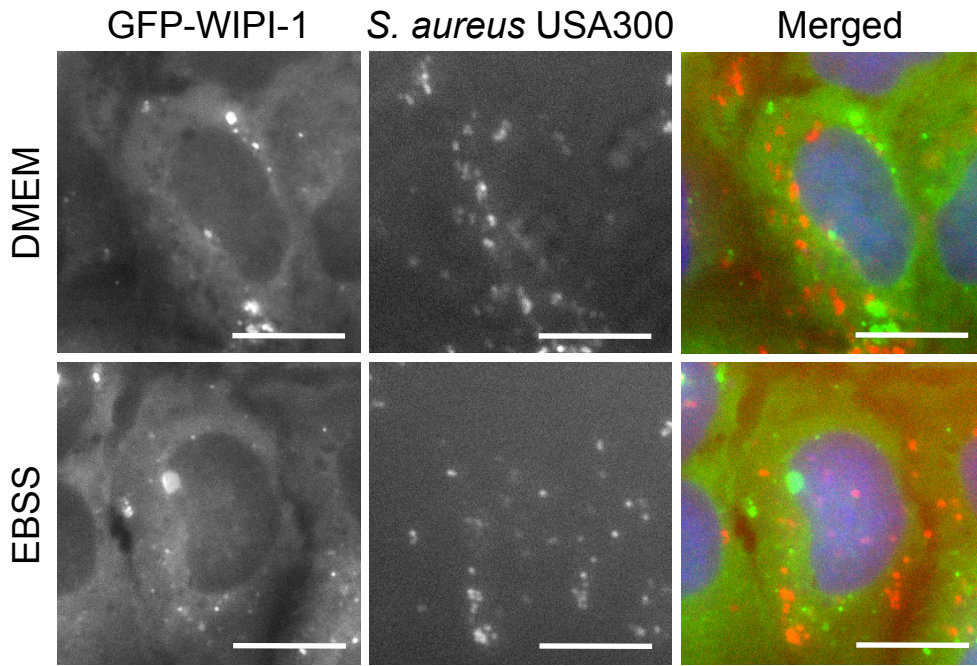

**Suppl. Figure 2**
